# Supplementary material
Source: publisher site journal article supplement (https://www.spandidos-publications.com/2969/downloadSupplementary)
Supplement: Supplementary file 1 [file downloadSupplementary]

## Sheet: Sheet4
The enriched GO terms of DEGs from CVSMCs
Category	Term	Count	%	P-value	Genes	List Total	Pop Hits	Pop Total	Fold Enrichment	Bonferroni	Benjamini	FDR
GOTERM_MF_DIRECT	GO:0005515~protein binding	211	63.7462	3.64953e-08	S100A4, RARRES3, HMGN2, FST, FSTL3, AURKA, PTTG1, AURKB, CITED2, CDCA8, CD44, DIRAS3, APOD, CFH, H2AFZ, CDCA5, CCNA2, CDCA4, CDCA3, CRYAB, DEPDC1, OPTN, PLAUR, PRDM8, UHRF1, RFC4, MAD2L1, TAGLN, ZWINT, RGCC, PGM1, PDGFRB, DCBLD2, NEK2, BDKRB1, TK1, ALCAM, FBXO5, SKA1, GCNT1, ODC1, BMP2, DUSP23, CDC20, NDC80, GAS1, GAS6, FAM64A, CD55, SRPX2, PCNA, DEPTOR, GK, PLAU, LXN, SUSD2, CDCP1, SMAP2, RPL39L…	314	8785	16881	1.29125	1.87949e-05	1.87949e-05	5.27731e-05
GOTERM_MF_DIRECT	GO:0008201~heparin binding	13	3.92749	4.4593e-05	CCL2, COL13A1, LXN, CXCL6, ECM2, ADGRG1, WISP1, SOST, CRISPLD2, CFH, PTN, THBS1, GPNMB	314	160	16881	4.36809	0.0227042	0.0114173	0.0644632
GOTERM_MF_DIRECT	GO:0003678~DNA helicase activity	6	1.81269	6.7526e-05	MCM7, MCM2, MCM3, MCM4, MCM5, MCM6	314	24	16881	13.4403	0.0341793	0.0115254	0.0975999
GOTERM_MF_DIRECT	GO:0019901~protein kinase binding	18	5.43807	0.000687249	CKS1B, IRS2, KIF11, PRC1, ACTA2, FOXM1, TPX2, AURKA, RACGAP1, CCNB1, RGCC, CKS2, FBXO5, PDGFRB, PPP1R15A, CCNA2, ERRFI1, KIF20A	314	376	16881	2.57367	0.298163	0.0847094	0.989196
GOTERM_MF_DIRECT	GO:0005518~collagen binding	7	2.1148	0.000835979	CTSK, CD44, LUM, TGFBI, ITGA2, DCN, ADGRG1	314	60	16881	6.27213	0.349952	0.0825359	1.20207
GOTERM_MF_DIRECT	GO:0003688~DNA replication origin binding	4	1.20846	0.00093279	CDC45, MCM2, MCM10, MCM5	314	11	16881	19.5495	0.381595	0.0769777	1.3404
GOTERM_MF_DIRECT	GO:0001968~fibronectin binding	5	1.51057	0.00125578	CTSK, FBLN1, FSTL3, THBS1, IGFBP5	314	26	16881	10.3387	0.476456	0.0883032	1.80063
GOTERM_MF_DIRECT	GO:0003697~single-stranded DNA binding	8	2.41692	0.00171055	PRIM1, CDC45, HMGB2, MCM7, RAD51AP1, MCM10, MCM4, MCM6	314	93	16881	4.62461	0.585918	0.104355	2.44523
GOTERM_MF_DIRECT	GO:0003682~chromatin binding	17	5.13595	0.00269626	CDK1, CEBPB, SVEP1, KIAA0101, FOXO1, CENPF, SNAI2, HMGA1, MCM5, CITED2, CDC45, NUPR1, CKS2, PCNA, CDCA5, TOP2A, UBE2T	314	391	16881	2.33744	0.751037	0.143152	3.8289
GOTERM_MF_DIRECT	GO:0042802~identical protein binding	26	7.85498	0.00335436	S100A4, MTSS1, ASS1, PRC1, E2F7, ZBTB16, MCM10, TK1, C1QTNF5, HJURP, THBS1, TRIP13, CRYAB, NDC80, BIRC5, OPTN, MID1, STAT2, MCM6, FBLN1, PLK4, UHRF1, MAD2L1, SRPX2, PCNA, CBS	314	749	16881	1.86621	0.822786	0.158896	4.7425
GOTERM_MF_DIRECT	GO:0005178~integrin binding	8	2.41692	0.0034065	FBLN1, WISP1, FBLN5, TGFBI, ITGA2, ECM2, THBS1, GPNMB	314	105	16881	4.09609	0.827497	0.14765	4.81454
GOTERM_MF_DIRECT	GO:0019899~enzyme binding	15	4.53172	0.0038456	BIRC5, CDC20, HACD1, MCM2, MCM10, HMGA1, PLAUR, GSTM2, RFC4, PLSCR4, PCNA, PDGFRB, SORT1, TOP2A, CBS	314	333	16881	2.42167	0.862524	0.15241	5.41919
GOTERM_MF_DIRECT	GO:0008017~microtubule binding	11	3.32326	0.00556277	KIF23, KIF11, PRC1, CRYAB, KIF20B, NUSAP1, BIRC5, SKA1, RACGAP1, MID1, KIF20A	314	208	16881	2.84314	0.943461	0.198272	7.7496
GOTERM_MF_DIRECT	GO:0042826~histone deacetylase binding	7	2.1148	0.0118067	DACT1, CEBPB, HEY2, CDC20, ANKRD1, KPNA2, TOP2A	314	102	16881	3.68949	0.997794	0.353966	15.7805
GOTERM_MF_DIRECT	GO:0050840~extracellular matrix binding	4	1.20846	0.0119715	TGFBI, DCN, THBS1, ADGRG1	314	26	16881	8.27095	0.997976	0.33867	15.9834
GOTERM_MF_DIRECT	GO:0035035~histone acetyltransferase binding	4	1.20846	0.0146803	CEBPB, EPAS1, PCNA, CITED2	314	28	16881	7.68016	0.999508	0.378751	19.2534
GOTERM_MF_DIRECT	GO:0004712~protein serine/threonine/tyrosine kinase activity	4	1.20846	0.0161538	RPS6KA2, TTK, AURKA, AURKB	314	29	16881	7.41533	0.999772	0.389429	20.982
GOTERM_MF_DIRECT	GO:0050699~WW domain binding	4	1.20846	0.0193412	KIF20B, TCEAL1, TCEAL4, TCEAL3	314	31	16881	6.93692	0.999957	0.428103	24.6042
GOTERM_MF_DIRECT	GO:0017124~SH3 domain binding	7	2.1148	0.0235142	SH3BGRL, PLSCR4, PTTG3P, SH3KBP1, ZNF106, PTTG1, ERRFI1	314	119	16881	3.16242	0.999995	0.475322	29.113
GOTERM_MF_DIRECT	GO:0004364~glutathione transferase activity	4	1.20846	0.0266828	GSTM2, CLIC3, GSTT1, MGST1	314	35	16881	6.14413	0.999999	0.501632	32.3675
GOTERM_MF_DIRECT	GO:0005102~receptor binding	13	3.92749	0.0322048	CXCL1, MTSS1, BMP2, CCL2, GAS6, PLAUR, ALCAM, LAMA2, GSTM2, ADM, SRPX2, PDGFRB, CROT	314	353	16881	1.97987	1	0.551919	37.709
GOTERM_MF_DIRECT	GO:0001102~RNA polymerase II activating transcription factor binding	4	1.20846	0.0330329	EXOSC9, LMO2, HEY2, BEX1	314	38	16881	5.65907	1	0.544487	38.4753
GOTERM_MF_DIRECT	GO:0048037~cofactor binding	3	0.906344	0.0346507	TYMS, LMO2, BIRC5	314	16	16881	10.0802	1	0.54599	39.9471
GOTERM_MF_DIRECT	GO:0005201~extracellular matrix structural constituent	5	1.51057	0.03572	FBLN1, COL4A1, LUM, MGP, TFPI2	314	67	16881	4.01203	1	0.54183	40.9019
GOTERM_MF_DIRECT	GO:0061575~cyclin-dependent protein serine/threonine kinase activator activity	2	0.60423	0.0367404	CKS1B, CKS2	314	2	16881	53.7611	1	0.537499	41.7998
GOTERM_MF_DIRECT	GO:0004745~retinol dehydrogenase activity	3	0.906344	0.0431249	AKR1C3, BMP2, ADH1A	314	18	16881	8.96019	1	0.582374	47.1357
GOTERM_MF_DIRECT	GO:0008301~DNA binding, bending	3	0.906344	0.0431249	HMGB2, TOP2A, FOXD1	314	18	16881	8.96019	1	0.582374	47.1357
GOTERM_MF_DIRECT	GO:0042803~protein homodimerization activity	21	6.34441	0.0535261	ODC1, CEBPB, CRYAB, TTK, CENPF, BIRC5, ZBTB16, MID1, ECT2, GSTM2, TYMS, MAD2L1, HSPB6, FBLN5, ALDH1A3, HEY2, KIF20B, QPRT, TOP2A, MGST1, CBS	314	730	16881	1.54655	1	0.649817	54.8638
GOTERM_MF_DIRECT	GO:0070051~fibrinogen binding	2	0.60423	0.0546028	FBLN1, THBS1	314	3	16881	35.8408	1	0.643978	55.6007
GOTERM_MF_DIRECT	GO:0070052~collagen V binding	2	0.60423	0.0546028	ECM2, THBS1	314	3	16881	35.8408	1	0.643978	55.6007
GOTERM_MF_DIRECT	GO:0004602~glutathione peroxidase activity	3	0.906344	0.0570923	GSTM2, GSTT1, MGST1	314	21	16881	7.68016	1	0.647947	57.2616
GOTERM_MF_DIRECT	GO:0003777~microtubule motor activity	5	1.51057	0.0613665	KIF23, KIF2C, KIF11, KIF20B, KIF20A	314	80	16881	3.36007	1	0.66283	59.9792
GOTERM_MF_DIRECT	GO:0016597~amino acid binding	3	0.906344	0.0620528	ASS1, DDAH1, GCHFR	314	22	16881	7.33107	1	0.655013	60.4002
GOTERM_MF_DIRECT	GO:0008009~chemokine activity	4	1.20846	0.0622945	CXCL1, CCL2, CXCL8, CXCL6	314	49	16881	4.38867	1	0.644823	60.5475
GOTERM_MF_DIRECT	GO:0035173~histone kinase activity	2	0.60423	0.0721351	CCNB1, CDK1	314	4	16881	26.8806	1	0.68914	66.1295
GOTERM_MF_DIRECT	GO:0042393~histone binding	6	1.81269	0.0768096	CKS1B, UHRF1, HJURP, CKS2, HIST1H4C, MCM2	314	122	16881	2.64399	1	0.701967	68.515
GOTERM_MF_DIRECT	GO:0004871~signal transducer activity	8	2.41692	0.0861113	IRS2, PLCXD3, FST, STMN1, WLS, ECT2, STAT2, IL13RA2	314	204	16881	2.10828	1	0.734189	72.8039
GOTERM_MF_DIRECT	GO:0035174~histone serine kinase activity	2	0.60423	0.0893432	AURKA, AURKB	314	5	16881	21.5045	1	0.737852	74.162
GOTERM_MF_DIRECT	GO:0038085~vascular endothelial growth factor binding	2	0.60423	0.0893432	PDGFRB, PTN	314	5	16881	21.5045	1	0.737852	74.162
GOTERM_MF_DIRECT	GO:0005524~ATP binding	36	10.8761	0.0907713	KIF23, ASS1, NEK2, TTK, AURKA, AURKB, TK1, KIF2C, MCM7, BUB1, DDX10, TOP2A, TRIP13, CDK1, KIF11, ACTA2, ALPK2, PFKP, TPX2, MCM2, PBK, UBE2C, MCM3, MCM4, MCM5, MCM6, PLK4, RFC4, RPS6KA2, RRM1, KIF20B, PDGFRB, GK, MELK, UBE2T, KIF20A	314	1495	16881	1.29458	1	0.734066	74.7418
GOTERM_CC_DIRECT	GO:0005737~cytoplasm	145	43.8066	2.15147e-09	STIL, MTSS1, CTHRC1, HMGN2, PRC1, LMO3, TTK, FOXO1, ANKRD1, PTTG1, MCM10, CITED2, GSTM2, BDNF, CDCA7, CD44, HIST1H2BK, OIP5, DNAJC9, C1ORF198, CCNA2, CDCA5, ASPM, NUDT1, CRYAB, OPTN, RNASEH2A, TACC3, METTL7A, DDIT4, ELL2, HSPB6, TAGLN, CD34, ZWINT, RGCC, PGM1, HSPB2, PDGFRB, HAS2, STMN1, SLC40A1, GRB14, SLC2A10, PLCXD3, HMGB2, ASS1, NEK2, BEX1, PRUNE2, RPS29, FBXO5, ARHGDIB, CKAP2, ODC1, EPAS1, P…	329	5222	18224	1.53808	6.32532e-07	6.32532e-07	2.86615e-06
GOTERM_CC_DIRECT	GO:0005829~cytosol	103	31.1178	8.20673e-09	STIL, PRC1, FOXO1, AURKA, ADH1A, ANKRD1, PTTG1, AURKB, GSTM2, CDCA8, IL1B, ZNF106, DDAH1, CDCA5, CDCA3, IRS2, NUDT1, CRYAB, GSTT1, OPTN, DDIT4, MAD2L1, ZWINT, PGM1, RGCC, HSPB2, STMN1, GRB14, ASS1, NEK2, MYL9, TK1, SPC24, SPC25, RPS29, FBXO5, SKA1, ARHGDIB, ODC1, EPAS1, DUSP23, NDC80, CDC20, PLK4, PDE7B, GLS, QPRT, GK, KIF23, AKR1C3, KIF2C, MCM7, GSN, ERRFI1, FOSL1, PPP1R14A, CDK1, EXOSC9, KIF11,…	329	3315	18224	1.72108	2.41278e-06	1.20639e-06	1.09329e-05
GOTERM_CC_DIRECT	GO:0005819~spindle	15	4.53172	3.79708e-08	KIF23, KIF11, PRC1, TPX2, NUSAP1, CENPF, TTK, BIRC5, CDC20, AURKA, AURKB, MID1, RPS6KA2, FBXO5, KIF20A	329	121	18224	6.86679	1.11633e-05	3.72113e-06	5.05841e-05
GOTERM_CC_DIRECT	GO:0000777~condensed chromosome kinetochore	13	3.92749	5.01043e-08	SPC24, CENPN, KIF2C, SPC25, CENPM, MAD2L1, HJURP, NEK2, ZWINT, BUB1, NDC80, BIRC5, CENPK	329	87	18224	8.27698	1.47306e-05	3.68266e-06	6.67481e-05
GOTERM_CC_DIRECT	GO:0030496~midbody	15	4.53172	8.59758e-08	KIF23, CDK1, CDCA8, PRC1, NEK2, KIF20B, CENPF, BIRC5, AURKA, CEP55, AURKB, RACGAP1, ECT2, ASPM, KIF20A	329	129	18224	6.44094	2.52766e-05	5.05536e-06	0.000114536
GOTERM_CC_DIRECT	GO:0042555~MCM complex	6	1.81269	2.17579e-07	MCM7, MCM2, MCM3, MCM4, MCM5, MCM6	329	9	18224	36.9281	6.39661e-05	1.06613e-05	0.000289855
GOTERM_CC_DIRECT	GO:0005634~nucleus	141	42.5982	3.3608e-07	S100A4, HMGN2, LMO2, PRC1, FSTL3, FOXO1, AURKA, ANKRD1, PTTG1, AURKB, MCM10, TCEAL1, TCEAL4, TCEAL3, CITED2, CDCA8, CDCA7, HIST1H2BK, OIP5, DNAJC9, CREB3L2, H2AFZ, TFPI2, CCNA2, CDCA5, CDCA4, ASPM, NUDT1, CRYAB, OPTN, DEPDC1, PRDM8, UHRF1, MAD2L1, HSPB6, ZWINT, RGCC, HSPB2, PDGFRB, VGLL3, HMGB2, ASS1, NEK2, BEX1, IL33, SPC24, SPC25, FBXO5, HIST1H4C, GINS2, CSTF3, EPAS1, DUSP23, LMCD1, ITGA2, CDC2…	329	5415	18224	1.44234	9.88026e-05	1.41153e-05	0.000447719
GOTERM_CC_DIRECT	GO:0005654~nucleoplasm	84	25.3776	1.35187e-06	KIF23, PRC1, E2F7, FSTL3, FOXO1, AURKA, IFI44L, ANKRD1, AURKB, MCM10, TCEAL1, PRIM1, SMAP2, CDCA8, CDC45, MCM7, CDCA7, HIST1H2BK, OIP5, HEY2, CREB3L2, TOP2A, CDCA5, CCNA2, CDK1, EXOSC9, CRYAB, TPX2, DEPDC1, MCM2, OPTN, MCM3, RNASEH2A, UBE2C, MCM4, HMGA1, MCM5, MCM6, ELL2, DACT1, RFC4, RRM1, KPNA2, UBE2T, CKS1B, HMGB2, FKBP5, FOXM1, KIAA0101, ANLN, NEO1, TYMS, RPS29, HJURP, FNDC1, BUB1, FBXO5, HIS…	329	2784	18224	1.67131	0.00039737	4.96798e-05	0.00180092
GOTERM_CC_DIRECT	GO:0000922~spindle pole	12	3.62538	4.33624e-06	CKAP2, CCNB1, POC1A, KIF11, MAD2L1, PRC1, NEK2, CKAP2L, TPX2, CENPF, CDC20, TACC3	329	109	18224	6.09821	0.00127404	0.000141641	0.00577651
GOTERM_CC_DIRECT	GO:0000775~chromosome, centromeric region	9	2.71903	7.75583e-06	CENPN, KIF2C, CDCA8, HJURP, OIP5, CENPF, NDC80, BIRC5, CDCA5	329	57	18224	8.74612	0.00227763	0.000227996	0.0103317
GOTERM_CC_DIRECT	GO:0005615~extracellular space	48	14.5015	9.10407e-06	S100A4, CXCL1, CTHRC1, HMGB2, CCL2, LUM, FSTL3, CXCL8, CXCL6, DCN, IL33, C1QTNF5, WISP1, HIST1H2BK, APOD, GSN, PAPPA, DNAJC9, TGFBI, PRSS3, CFH, IL1B, PTN, PDGFD, SEMA3A, THBS1, GCNT1, RAMP1, IL13RA2, BMP2, NUDT1, ACTA2, PODXL, LMCD1, ECM2, GAS6, DKK3, SH3BGRL, CTSK, FBLN1, SOST, SRPX2, PTGDS, ADM, FBLN5, PROS1, PLAU, CD14	329	1347	18224	1.97388	0.00267303	0.000243298	0.0121276
GOTERM_CC_DIRECT	GO:0005876~spindle microtubule	8	2.41692	1.24112e-05	CDK1, KIF11, PRC1, NUSAP1, AURKA, BIRC5, SKA1, AURKB	329	44	18224	10.0713	0.00364225	0.000304029	0.0165327
GOTERM_CC_DIRECT	GO:0031012~extracellular matrix	18	5.43807	2.8099e-05	COL4A1, LUM, PFKP, LMCD1, MGP, MMP16, DCN, MMP1, LAMA2, FBLN1, SOST, MMP23B, FBLN5, TGFBI, HIST1H4C, THBS1, COL8A1, TFPI2	329	296	18224	3.36844	0.00822721	0.000635278	0.0374266
GOTERM_CC_DIRECT	GO:0005813~centrosome	22	6.64653	3.26468e-05	CKAP2, KIF23, STIL, CDK1, NEK2, CENPF, AURKA, CDC20, CEP55, MCM3, ELL2, CCNB1, CDC45, PLK4, POC1A, CCNB2, ID2, NCAPG, CKAP2L, RGCC, PCNA, KIF20B	329	426	18224	2.86062	0.00955241	0.00068536	0.0434829
GOTERM_CC_DIRECT	GO:0032133~chromosome passenger complex	4	1.20846	5.62454e-05	CDCA8, AURKA, BIRC5, AURKB	329	5	18224	44.3137	0.0164006	0.00110183	0.0749033
GOTERM_CC_DIRECT	GO:0005576~extracellular region	51	15.4079	9.80571e-05	LYPD1, FST, FSTL3, CDCP1, MMP1, BDNF, APOD, GSN, PAPPA, TGFBI, CFH, IL1B, PDGFD, SEMA3A, IL13RA2, COL22A1, CTSK, PTGDS, ADM, CHSY1, PROS1, CXCL1, CCL2, LUM, CXCL8, DCN, IL33, CXCL6, PLIN2, NPTX2, CRISPLD2, FNDC1, PRSS3, HIST1H4C, THBS1, COL8A1, BMP2, SVEP1, COL4A1, COL13A1, GAS6, LAMA2, DKK3, CD55, FBLN1, SOST, FBLN5, HEBP1, PLAU, CD14, IGFBP5	329	1610	18224	1.75466	0.0284186	0.00180027	0.130551
GOTERM_CC_DIRECT	GO:0000776~kinetochore	9	2.71903	0.000103874	KIF2C, MAD2L1, NEK2, ZWINT, BUB1, CENPF, TTK, NDC80, AURKB	329	81	18224	6.15468	0.030079	0.0017949	0.138291
GOTERM_CC_DIRECT	GO:0051233~spindle midzone	5	1.51057	0.000322482	CDCA8, KIF20B, AURKA, AURKB, RACGAP1	329	19	18224	14.5769	0.0904679	0.0052542	0.428753
GOTERM_CC_DIRECT	GO:0005578~proteinaceous extracellular matrix	15	4.53172	0.000376587	CTHRC1, LUM, COL22A1, MGP, MMP16, ECM2, MMP1, FBLN1, WISP1, SOST, MMP23B, CRISPLD2, FBLN5, TGFBI, TFPI2	329	268	18224	3.1003	0.104826	0.00581134	0.500521
GOTERM_CC_DIRECT	GO:0048471~perinuclear region of cytoplasm	25	7.55287	0.000391431	S100A4, SLC2A10, HMGB2, CCL2, KIAA0101, AURKA, LPXN, BDNF, APOD, SORBS2, PTN, ODC1, MT1M, ITGA2, CENPF, CDC20, OPTN, MCM3, CDKN3, MT1X, MAD2L1, PTGDS, CD34, KIF20B, SORT1	329	621	18224	2.22996	0.108726	0.00573863	0.520202
GOTERM_CC_DIRECT	GO:0000784~nuclear chromosome, telomeric region	10	3.02115	0.000581171	CDK1, MCM7, PCNA, HIST1H4C, MCM2, MCM3, MCM4, MCM5, FEN1, MCM6	329	130	18224	4.26093	0.157106	0.00810573	0.771461
GOTERM_CC_DIRECT	GO:0072686~mitotic spindle	6	1.81269	0.00080672	KIF23, CDK1, MAD2L1, AURKA, RACGAP1, ECT2	329	41	18224	8.10616	0.211223	0.0107271	1.06937
GOTERM_CC_DIRECT	GO:0015630~microtubule cytoskeleton	10	3.02115	0.00084776	CKAP2, KIF2C, CCNB2, PRC1, CRYAB, TPX2, AURKA, MCM2, TACC3, MID1	329	137	18224	4.04322	0.220691	0.0107826	1.12349
GOTERM_CC_DIRECT	GO:0097149~centralspindlin complex	3	0.906344	0.000957345	KIF23, RACGAP1, ECT2	329	3	18224	55.3921	0.24542	0.0116645	1.26786
GOTERM_CC_DIRECT	GO:0070062~extracellular exosome	73	22.0544	0.0010008	S100A4, LXN, SUSD2, AKR1C3, GSTM2, CD44, APOD, GSN, TGFBI, H2AFZ, CFH, IL1B, PDGFD, DDAH1, NT5E, TUBB3, CDK1, EXOSC9, NUDT1, ACTA2, CRYAB, PFKP, GSTT1, MGP, WLS, METTL7A, PLAUR, PTGDS, CLIC3, RRM1, PGM1, CYBRD1, PDGFRB, STMN1, SMS, PROS1, ASS1, FKBP5, IFITM3, LUM, CDH6, ALCAM, C1QTNF5, RPS29, CRISPLD2, KRT7, ALDH1A3, PRSS3, HIST1H4C, COL8A1, THBS1, GLRX, ARHGDIB, PODXL, DUSP23, RACGAP1, ADGRG1, G…	329	2811	18224	1.4385	0.25501	0.0117063	1.32507
GOTERM_CC_DIRECT	GO:0000942~condensed nuclear chromosome outer kinetochore	3	0.906344	0.00189189	CCNB1, BUB1, NDC80	329	4	18224	41.5441	0.426927	0.0211855	2.49117
GOTERM_CC_DIRECT	GO:0031262~Ndc80 complex	3	0.906344	0.00189189	SPC24, SPC25, NDC80	329	4	18224	41.5441	0.426927	0.0211855	2.49117
GOTERM_CC_DIRECT	GO:0005874~microtubule	14	4.22961	0.00434664	KIF23, KIF11, NEK2, TPX2, NUSAP1, AURKA, BIRC5, RACGAP1, MID1, KIF2C, KIF20B, STMN1, TUBB3, KIF20A	329	311	18224	2.49353	0.722156	0.0463258	5.63797
GOTERM_CC_DIRECT	GO:0005814~centriole	8	2.41692	0.00435731	STIL, POC1A, PLK4, CCNF, AURKA, BIRC5, CEP55, TOP2A	329	113	18224	3.92156	0.72303	0.0448164	5.65144
GOTERM_CC_DIRECT	GO:0005925~focal adhesion	16	4.83384	0.00501616	KIF23, LIMS2, FHL1, ITGA2, PALLD, HMGA1, PLAUR, ALCAM, LPXN, CD44, RPS29, SORBS2, GSN, SH3KBP1, PDGFRB, PLAU	329	391	18224	2.26668	0.772012	0.0497037	6.47979
GOTERM_CC_DIRECT	GO:0031298~replication fork protection complex	3	0.906344	0.00638851	GINS2, CDC45, MCM10	329	7	18224	23.7395	0.848057	0.0608765	8.18365
GOTERM_CC_DIRECT	GO:0045171~intercellular bridge	5	1.51057	0.00793904	KIF23, CDCA8, CD34, CEP55, AURKB	329	44	18224	6.29456	0.903998	0.0728067	10.0741
GOTERM_CC_DIRECT	GO:0016023~cytoplasmic, membrane-bounded vesicle	8	2.41692	0.0125384	BDNF, NKD2, PDGFRB, SORT1, WLS, OPTN, ARHGDIB, PHLDA1	329	138	18224	3.21114	0.975512	0.109458	15.4722
GOTERM_CC_DIRECT	GO:0031616~spindle pole centrosome	3	0.906344	0.0132099	DLGAP5, AURKA, AURKB	329	10	18224	16.6176	0.979951	0.111724	16.2348
GOTERM_CC_DIRECT	GO:0005871~kinesin complex	5	1.51057	0.0151049	KIF23, KIF2C, KIF11, KIF20B, KIF20A	329	53	18224	5.22567	0.988607	0.123316	18.3526
GOTERM_CC_DIRECT	GO:0010369~chromocenter	3	0.906344	0.0189209	CDCA8, OIP5, AURKB	329	12	18224	13.848	0.996361	0.148247	22.4677
GOTERM_CC_DIRECT	GO:0000785~chromatin	6	1.81269	0.0222738	MCM7, HMGN2, OIP5, CENPF, MCM2, HMGA1	329	89	18224	3.7343	0.99867	0.16803	25.9243
GOTERM_CC_DIRECT	GO:0009986~cell surface	17	5.13595	0.0369732	DCBLD2, BMP2, CRYAB, ITGA2, MMP16, SLC7A11, HMMR, CD55, CD44, SRPX2, SORT1, PTN, PDGFRB, THBS1, NT5E, RAMP1, PLAU	329	542	18224	1.73739	0.999985	0.258704	39.4613
GOTERM_CC_DIRECT	GO:0032154~cleavage furrow	4	1.20846	0.0524035	PLK4, CEP55, RACGAP1, ECT2	329	47	18224	4.71422	1	0.340615	51.1819
GOTERM_CC_DIRECT	GO:0005604~basement membrane	5	1.51057	0.0541672	LAMA2, FBLN1, COL4A1, TGFBI, PTN	329	79	18224	3.50583	1	0.34283	52.3785
GOTERM_CC_DIRECT	GO:0005788~endoplasmic reticulum lumen	8	2.41692	0.0588825	COL4A1, COL13A1, COL22A1, PDGFD, THBS1, COL8A1, GAS6, PLAUR	329	192	18224	2.308	1	0.359849	55.4459
GOTERM_CC_DIRECT	GO:0019005~SCF ubiquitin ligase complex	4	1.20846	0.0609378	CKS1B, CCNF, CKS2, FBXO32	329	50	18224	4.43137	1	0.362913	56.7249
GOTERM_CC_DIRECT	GO:0005881~cytoplasmic microtubule	4	1.20846	0.063918	CKAP2, KIF2C, BIRC5, MID1	329	51	18224	4.34448	1	0.370208	58.5191
GOTERM_CC_DIRECT	GO:0002102~podosome	3	0.906344	0.0687439	LPXN, GSN, PALLD	329	24	18224	6.92401	1	0.385504	61.2793
GOTERM_CC_DIRECT	GO:0000228~nuclear chromosome	4	1.20846	0.070076	EXOSC9, BIRC5, HIST1H4C, TOP2A	329	53	18224	4.18054	1	0.38458	62.0107
GOTERM_CC_DIRECT	GO:0071953~elastic fiber	2	0.60423	0.0700782	FBLN1, FBLN5	329	4	18224	27.696	1	0.377915	62.0118
GOTERM_CC_DIRECT	GO:0005581~collagen trimer	5	1.51057	0.0844295	CTHRC1, C1QTNF5, COL13A1, COL22A1, MMP1	329	92	18224	3.01044	1	0.430937	69.1209
GOTERM_CC_DIRECT	GO:0030133~transport vesicle	5	1.51057	0.0923783	CD55, C1QTNF5, NPTX1, CRISPLD2, IL33	329	95	18224	2.91537	1	0.454642	72.5074
GOTERM_CC_DIRECT	GO:0005796~Golgi lumen	5	1.51057	0.0951045	LUM, MMP16, DCN, PROS1, GAS6	329	96	18224	2.88501	1	0.457793	73.5874
GOTERM_CC_DIRECT	GO:0015629~actin cytoskeleton	8	2.41692	0.0998945	MTSS1, ACTA2, SORBS2, GSN, NCAPG, PGM1, ANLN, PALLD	329	218	18224	2.03274	1	0.468185	75.3904
GOTERM_BP_DIRECT	GO:0007067~mitotic nuclear division	31	9.36556	5.91842e-16	NEK2, ANLN, AURKA, AURKB, PTTG1, CEP55, SPC24, SPC25, KIF2C, OIP5, BUB1, FBXO5, SKA1, CCNA2, CDCA5, TUBB3, ASPM, CDCA3, CENPN, CDK1, KIF11, CCNF, TPX2, CENPF, NDC80, BIRC5, CDC20, PBK, FAM64A, CCNB2, KIF20B	319	248	16792	6.57994	1.10745e-12	1.10745e-12	9.54792e-13
GOTERM_BP_DIRECT	GO:0051301~cell division	36	10.8761	7.27581e-16	CKS1B, NEK2, AURKA, PTTG1, SPC24, SPC25, KIF2C, CDCA8, CDCA7, NCAPG, OIP5, BUB1, FBXO5, SKA1, CCNA2, CDCA5, CDCA4, CDCA3, CDK1, KIF11, CCNF, TPX2, CENPF, NDC80, BIRC5, CDC20, TACC3, UBE2C, MCM5, CCNB1, FAM64A, CCNB2, MAD2L1, ZWINT, KIF20B, CKS2	319	350	16792	5.41435	1.55043e-12	7.75158e-13	1.33227e-12
GOTERM_BP_DIRECT	GO:0007062~sister chromatid cohesion	17	5.13595	9.5401e-11	CENPN, CENPM, CENPF, BIRC5, NDC80, CDC20, AURKB, CENPK, SPC24, KIF2C, SPC25, CDCA8, MAD2L1, ZWINT, BUB1, SKA1, CDCA5	319	103	16792	8.68807	1.90325e-07	6.34417e-08	1.63977e-07
GOTERM_BP_DIRECT	GO:0000082~G1/S transition of mitotic cell cycle	15	4.53172	7.61986e-09	CDK1, MCM2, CDKN3, MCM10, MCM3, MCM4, MCM5, MCM6, PRIM1, TYMS, CDC45, MCM7, PCNA, FBXO5, CDCA5	319	102	16792	7.7411	1.52015e-05	3.8004e-06	1.30972e-05
GOTERM_BP_DIRECT	GO:0008283~cell proliferation	26	7.85498	3.3855e-08	CXCL1, STIL, CKS1B, AURKB, MCM10, CITED2, KIF2C, TYMS, MCM7, TGFBI, BUB1, CDK1, IRS2, DLGAP5, TPX2, ITGA2, CENPF, TACC3, GAS6, DDIT4, UHRF1, CD34, CKS2, ADRA1B, PCNA, MELK	319	366	16792	3.73942	6.75384e-05	1.3508e-05	5.81906e-05
GOTERM_BP_DIRECT	GO:0006270~DNA replication initiation	9	2.71903	1.07275e-07	PRIM1, CDC45, MCM7, MCM2, MCM3, MCM10, MCM4, MCM5, MCM6	319	32	16792	14.8049	0.000213991	3.56684e-05	0.000184386
GOTERM_BP_DIRECT	GO:0006260~DNA replication	16	4.83384	2.59813e-07	GINS2, CDK1, KIAA0101, MCM2, MCM10, RNASEH2A, MCM3, MCM4, MCM5, MCM6, CDC45, RFC4, MCM7, RRM1, PCNA, FEN1	319	155	16792	5.43375	0.000518193	7.40441e-05	0.000446571
GOTERM_BP_DIRECT	GO:0006268~DNA unwinding involved in DNA replication	6	1.81269	5.5028e-07	MCM7, MCM2, HMGA1, TOP2A, MCM4, MCM6	319	10	16792	31.5837	0.00109721	0.000137217	0.000945827
GOTERM_BP_DIRECT	GO:0036120~cellular response to platelet-derived growth factor stimulus	7	2.1148	6.7428e-07	CCL2, PDGFRB, PTN, HAS2, PDGFD, ERRFI1, CCNA2	319	18	16792	20.4709	0.00134428	0.000149454	0.00115896
GOTERM_BP_DIRECT	GO:0000281~mitotic cytokinesis	8	2.41692	8.92204e-07	CKAP2, KIF23, NUSAP1, ANLN, STMN1, CEP55, RACGAP1, KIF20A	319	29	16792	14.5212	0.00177837	0.000177979	0.00153353
GOTERM_BP_DIRECT	GO:0007052~mitotic spindle organization	8	2.41692	1.14497e-06	CCNB1, STIL, SPC25, KIF11, TTK, NDC80, AURKA, STMN1	319	30	16792	14.0372	0.00228161	0.000207634	0.00196797
GOTERM_BP_DIRECT	GO:0007059~chromosome segregation	10	3.02115	5.16822e-06	CENPN, SPC25, KIF11, HJURP, OIP5, NEK2, CENPF, NDC80, SKA1, TOP2A	319	68	16792	7.7411	0.0102576	0.000858849	0.00888286
GOTERM_BP_DIRECT	GO:0000086~G2/M transition of mitotic cell cycle	13	3.92749	1.16156e-05	CCNB1, CDK1, PLK4, CCNB2, NEK2, FOXM1, TPX2, AURKA, BIRC5, OPTN, MELK, HMMR, PHLDA1	319	137	16792	4.99499	0.0229068	0.00178097	0.0199632
GOTERM_BP_DIRECT	GO:0009612~response to mechanical stimulus	9	2.71903	1.45047e-05	TXNIP, CCNB1, SOST, CCL2, BDKRB1, DCN, THBS1, FOSL1, CITED2	319	59	16792	8.02975	0.0285225	0.00206481	0.0249281
GOTERM_BP_DIRECT	GO:0032570~response to progesterone	7	2.1148	8.47685e-05	TXNIP, TYMS, CCL2, OXTR, PTN, THBS1, FOSL1	319	39	16792	9.44812	0.155593	0.0112114	0.145602
GOTERM_BP_DIRECT	GO:0030198~extracellular matrix organization	14	4.22961	9.56184e-05	COL4A1, COL13A1, LUM, ITGA2, DCN, ECM2, LAMA2, FBLN1, CD44, CRISPLD2, FBLN5, TGFBI, THBS1, COL8A1	319	196	16792	3.75996	0.173676	0.0118522	0.164224
GOTERM_BP_DIRECT	GO:0071407~cellular response to organic cyclic compound	8	2.41692	0.000119913	CCNB1, BMP2, CCL2, CYP1B1, CEBPB, IL1B, ANKRD1, IGFBP5	319	59	16792	7.13756	0.212775	0.0139745	0.205909
GOTERM_BP_DIRECT	GO:0007155~cell adhesion	22	6.64653	0.000187735	MTSS1, CCL2, SVEP1, CYP1B1, PODXL, ITGA2, NEO1, ADGRG1, GAS6, CDH6, ALCAM, LAMA2, LPXN, WISP1, CD44, SORBS2, CD34, TGFBI, THBS1, COL8A1, GPNMB, NTM	319	459	16792	2.52303	0.312412	0.0205942	0.322192
GOTERM_BP_DIRECT	GO:0007051~spindle organization	5	1.51057	0.000191862	KIF11, TTK, AURKA, AURKB, ASPM	319	16	16792	16.4498	0.318051	0.0199458	0.329264
GOTERM_BP_DIRECT	GO:0071549~cellular response to dexamethasone stimulus	6	1.81269	0.000192916	CCL2, ASS1, FOXO1, FBXO32, ERRFI1, DDIT4	319	29	16792	10.8909	0.319484	0.0190612	0.33107
GOTERM_BP_DIRECT	GO:0008285~negative regulation of cell proliferation	19	5.74018	0.000577718	CXCL1, RARRES3, BMP2, ADARB1, CYP1B1, E2F7, CXCL8, ZBTB16, CDKN3, ADGRG1, HMGA1, MXD4, ADM, RPS6KA2, BTG3, RGCC, IL1B, GPNMB, FOSL1	319	396	16792	2.52563	0.684274	0.0534193	0.988362
GOTERM_BP_DIRECT	GO:0043065~positive regulation of apoptotic process	16	4.83384	0.000627293	TXNIP, BMP2, CYP1B1, FOXO1, ANKRD1, ZBTB16, ECT2, NUPR1, ADM, RPS6KA2, ALDH1A3, PTN, PDGFRB, TOP2A, FOSL1, MELK	319	300	16792	2.80744	0.714023	0.0553133	1.07275
GOTERM_BP_DIRECT	GO:0042493~response to drug	16	4.83384	0.000719143	TXNIP, CDK1, HMGB2, ASS1, ITGA2, OXTR, CENPF, CCNB1, TYMS, MCM7, PLIN2, APOD, PTN, THBS1, FOSL1, MGST1	319	304	16792	2.7705	0.761934	0.0604933	1.22891
GOTERM_BP_DIRECT	GO:0031145~anaphase-promoting complex-dependent catabolic process	8	2.41692	0.000738294	CCNB1, CDK1, MAD2L1, AURKA, CDC20, PTTG1, AURKB, UBE2C	319	79	16792	5.33058	0.770864	0.0595468	1.26144
GOTERM_BP_DIRECT	GO:0051439~regulation of ubiquitin-protein ligase activity involved in mitotic cell cycle	5	1.51057	0.000840791	CCNB1, CDK1, FBXO5, CDC20, UBE2C	319	23	16792	11.4434	0.813269	0.0649202	1.43537
GOTERM_BP_DIRECT	GO:0000083~regulation of transcription involved in G1/S transition of mitotic cell cycle	5	1.51057	0.000840791	CDK1, TYMS, CDC45, PCNA, FBXO5	319	23	16792	11.4434	0.813269	0.0649202	1.43537
GOTERM_BP_DIRECT	GO:0000070~mitotic sister chromatid segregation	5	1.51057	0.00116587	MAD2L1, NEK2, ZWINT, NUSAP1, NDC80	319	25	16792	10.5279	0.902438	0.0856212	1.98512
GOTERM_BP_DIRECT	GO:0034080~CENP-A containing nucleosome assembly	6	1.81269	0.00125947	CENPN, CENPM, HJURP, OIP5, HIST1H4C, CENPK	319	43	16792	7.34505	0.919074	0.0889152	2.14287
GOTERM_BP_DIRECT	GO:0045840~positive regulation of mitotic nuclear division	5	1.51057	0.00135749	RGCC, NUSAP1, PDGFRB, IL1B, AURKA	319	26	16792	10.123	0.933466	0.0922508	2.30782
GOTERM_BP_DIRECT	GO:0016477~cell migration	11	3.32326	0.00165576	CDK1, CTHRC1, SORBS2, PODXL, SH3KBP1, PDGFRB, BDKRB1, THBS1, PALLD, ADGRG1, GAS6	319	172	16792	3.36648	0.963337	0.107741	2.80813
GOTERM_BP_DIRECT	GO:0045600~positive regulation of fat cell differentiation	6	1.81269	0.00188718	BMP2, CEBPB, ID2, LMO3, ZBTB16, SNAI2	319	47	16792	6.71994	0.976913	0.118046	3.19464
GOTERM_BP_DIRECT	GO:0008584~male gonad development	8	2.41692	0.00204986	AKR1C3, HMGB2, NUDT1, NUPR1, RRM1, FSTL3, ASPM, CITED2	319	94	16792	4.47996	0.983322	0.123706	3.46548
GOTERM_BP_DIRECT	GO:0006271~DNA strand elongation involved in DNA replication	4	1.20846	0.00258508	PRIM1, GINS2, RFC4, PCNA	319	15	16792	14.0372	0.994281	0.149025	4.35151
GOTERM_BP_DIRECT	GO:0048146~positive regulation of fibroblast proliferation	6	1.81269	0.00349437	CCNB1, FBLN1, PDGFRB, PDGFD, CCNA2, GAS6	319	54	16792	5.84883	0.999073	0.190728	5.83928
GOTERM_BP_DIRECT	GO:0044849~estrous cycle	4	1.20846	0.00375668	PCNA, OXTR, PTN, HAS2	319	17	16792	12.3858	0.999452	0.198158	6.2644
GOTERM_BP_DIRECT	GO:0007568~aging	10	3.02115	0.00425647	TYMS, CCL2, NUDT1, ADM, APOD, ASS1, CRYAB, DCN, AURKB, IGFBP5	319	165	16792	3.19027	0.999799	0.215835	7.06939
GOTERM_BP_DIRECT	GO:0010628~positive regulation of gene expression	13	3.92749	0.00435568	CDK1, BMP2, ACTA2, GAS6, CITED2, FBLN1, ID2, CD34, RPS6KA2, GSN, RGCC, IL1B, FOXD1	319	262	16792	2.61188	0.999835	0.214869	7.22841
GOTERM_BP_DIRECT	GO:0070301~cellular response to hydrogen peroxide	6	1.81269	0.00441876	CDK1, CYP1B1, PCNA, FOXO1, PDGFD, ECT2	319	57	16792	5.541	0.999854	0.212414	7.32938
GOTERM_BP_DIRECT	GO:0001556~oocyte maturation	4	1.20846	0.0044454	CCNB1, RPS6KA2, FBXO5, TRIP13	319	18	16792	11.6977	0.999862	0.208562	7.372
GOTERM_BP_DIRECT	GO:0007080~mitotic metaphase plate congression	5	1.51057	0.00509466	CCNB1, KIF2C, CDCA8, CEP55, CDCA5	319	37	16792	7.11345	0.999962	0.229933	8.40484
GOTERM_BP_DIRECT	GO:0007162~negative regulation of cell adhesion	5	1.51057	0.00509466	LPXN, FBLN1, PODXL, TGFBI, ARHGDIB	319	37	16792	7.11345	0.999962	0.229933	8.40484
GOTERM_BP_DIRECT	GO:0032467~positive regulation of cytokinesis	5	1.51057	0.00509466	KIF23, KIF20B, AURKB, RACGAP1, ECT2	319	37	16792	7.11345	0.999962	0.229933	8.40484
GOTERM_BP_DIRECT	GO:0032873~negative regulation of stress-activated MAPK cascade	3	0.906344	0.00509936	FOXM1, FOXO1, PBK	319	6	16792	26.3197	0.999963	0.225069	8.41227
GOTERM_BP_DIRECT	GO:0060137~maternal process involved in parturition	3	0.906344	0.00509936	CD55, CCL2, OXTR	319	6	16792	26.3197	0.999963	0.225069	8.41227
GOTERM_BP_DIRECT	GO:0031536~positive regulation of exit from mitosis	3	0.906344	0.00509936	BIRC5, UBE2C, CDCA5	319	6	16792	26.3197	0.999963	0.225069	8.41227
GOTERM_BP_DIRECT	GO:0009636~response to toxic substance	7	2.1148	0.0055003	CDK1, TYMS, CYP1B1, NUPR1, PDGFRB, INMT, SLC7A11	319	85	16792	4.33502	0.999983	0.235379	9.04462
GOTERM_BP_DIRECT	GO:0001666~response to hypoxia	10	3.02115	0.00557377	BMP2, CCL2, ADM, EPAS1, CRYAB, ITGA2, THBS1, PLAU, DDIT4, CITED2	319	172	16792	3.06044	0.999986	0.233174	9.16005
GOTERM_BP_DIRECT	GO:0071222~cellular response to lipopolysaccharide	8	2.41692	0.00571242	HMGB2, CCL2, CEBPB, ASS1, PLSCR4, CXCL8, ANKRD1, CD14	319	113	16792	3.72669	0.999989	0.233399	9.37749
GOTERM_BP_DIRECT	GO:0007094~mitotic spindle assembly checkpoint	4	1.20846	0.00603941	MAD2L1, BUB1, CENPF, TTK	319	20	16792	10.5279	0.999994	0.240172	9.8884
GOTERM_BP_DIRECT	GO:0006977~DNA damage response, signal transduction by p53 class mediator resulting in cell cycle arrest	6	1.81269	0.00632663	CCNB1, CDK1, E2F7, RGCC, PCNA, AURKA	319	62	16792	5.09415	0.999997	0.245252	10.3349
GOTERM_BP_DIRECT	GO:0051988~regulation of attachment of spindle microtubules to kinetochore	3	0.906344	0.00705008	NEK2, RACGAP1, ECT2	319	7	16792	22.5598	0.999999	0.264233	11.4504
GOTERM_BP_DIRECT	GO:0030574~collagen catabolic process	6	1.81269	0.00723039	CTSK, COL4A1, COL13A1, MMP16, COL8A1, MMP1	319	64	16792	4.93495	0.999999	0.265101	11.7264
GOTERM_BP_DIRECT	GO:0032355~response to estradiol	7	2.1148	0.00763295	TXNIP, ASS1, CRYAB, PCNA, PDGFRB, OXTR, PTN	319	91	16792	4.04919	1	0.272733	12.3396
GOTERM_BP_DIRECT	GO:0030335~positive regulation of cell migration	10	3.02115	0.00853532	IRS2, BMP2, PODXL, PDGFRB, HAS2, PDGFD, THBS1, GPNMB, SNAI2, PLAU	319	184	16792	2.86084	1	0.294608	13.6996
GOTERM_BP_DIRECT	GO:0050900~leukocyte migration	8	2.41692	0.00858842	CD44, CD34, PODXL, PROS1, GAS6, GRB14, MMP1, SLC7A11	319	122	16792	3.45177	1	0.291183	13.779
GOTERM_BP_DIRECT	GO:0042787~protein ubiquitination involved in ubiquitin-dependent protein catabolic process	9	2.71903	0.00878474	CCNB1, CDK1, UHRF1, MAD2L1, AURKA, CDC20, PTTG1, AURKB, UBE2C	319	153	16792	3.09644	1	0.291891	14.072
GOTERM_BP_DIRECT	GO:0032967~positive regulation of collagen biosynthetic process	4	1.20846	0.00899821	CCL2, RGCC, PDGFRB, ITGA2	319	23	16792	9.1547	1	0.293041	14.3896
GOTERM_BP_DIRECT	GO:0051983~regulation of chromosome segregation	3	0.906344	0.00928308	KIF2C, BUB1, AURKB	319	8	16792	19.7398	1	0.296059	14.8116
GOTERM_BP_DIRECT	GO:0051256~mitotic spindle midzone assembly	3	0.906344	0.00928308	KIF23, AURKB, RACGAP1	319	8	16792	19.7398	1	0.296059	14.8116
GOTERM_BP_DIRECT	GO:0071456~cellular response to hypoxia	7	2.1148	0.00981994	CCNB1, EPAS1, RGCC, PTN, ANKRD1, CCNA2, MGARP	319	96	16792	3.8383	1	0.305515	15.6016
GOTERM_BP_DIRECT	GO:0051436~negative regulation of ubiquitin-protein ligase activity involved in mitotic cell cycle	6	1.81269	0.0110991	CCNB1, CDK1, MAD2L1, FBXO5, CDC20, UBE2C	319	71	16792	4.44841	1	0.33292	17.4561
GOTERM_BP_DIRECT	GO:0048589~developmental growth	4	1.20846	0.0113656	TYMS, ADM, GAS1, ASPM	319	25	16792	8.42232	1	0.334502	17.8377
GOTERM_BP_DIRECT	GO:2000134~negative regulation of G1/S transition of mitotic cell cycle	4	1.20846	0.0113656	DACT1, FHL1, E2F7, GPNMB	319	25	16792	8.42232	1	0.334502	17.8377
GOTERM_BP_DIRECT	GO:0031100~organ regeneration	5	1.51057	0.0118756	CDK1, CCL2, ADM, CCNA2, GAS6	319	47	16792	5.59995	1	0.341726	18.5631
GOTERM_BP_DIRECT	GO:0000910~cytokinesis	5	1.51057	0.0127666	KIF23, PRC1, BIRC5, ECT2, KIF20A	319	48	16792	5.48328	1	0.357221	19.8161
GOTERM_BP_DIRECT	GO:0034501~protein localization to kinetochore	3	0.906344	0.0145509	CDK1, TTK, AURKB	319	10	16792	15.7918	1	0.390815	22.271
GOTERM_BP_DIRECT	GO:0055015~ventricular cardiac muscle cell development	3	0.906344	0.0145509	CCNB1, CDK1, HEY2	319	10	16792	15.7918	1	0.390815	22.271
GOTERM_BP_DIRECT	GO:0051437~positive regulation of ubiquitin-protein ligase activity involved in regulation of mitotic cell cycle transition	6	1.81269	0.0145987	CCNB1, CDK1, MAD2L1, FBXO5, CDC20, UBE2C	319	76	16792	4.15575	1	0.386752	22.3358
GOTERM_BP_DIRECT	GO:0022617~extracellular matrix disassembly	6	1.81269	0.0145987	CTSK, CD44, GSN, MMP16, DCN, MMP1	319	76	16792	4.15575	1	0.386752	22.3358
GOTERM_BP_DIRECT	GO:0097421~liver regeneration	4	1.20846	0.017083	TYMS, CEBPB, PCNA, AURKA	319	29	16792	7.26062	1	0.430801	25.6333
GOTERM_BP_DIRECT	GO:0033690~positive regulation of osteoblast proliferation	3	0.906344	0.0175641	CTHRC1, BMP2, TMEM119	319	11	16792	14.3562	1	0.434582	26.2565
GOTERM_BP_DIRECT	GO:0044344~cellular response to fibroblast growth factor stimulus	4	1.20846	0.0187206	CCL2, CD44, CXCL8, SNAI2	319	30	16792	7.0186	1	0.45033	27.7344
GOTERM_BP_DIRECT	GO:0007018~microtubule-based movement	6	1.81269	0.0187709	KIF23, KIF2C, KIF11, KIF20B, RACGAP1, KIF20A	319	81	16792	3.89922	1	0.446052	27.7981
GOTERM_BP_DIRECT	GO:0071498~cellular response to fluid shear stress	3	0.906344	0.0208162	MTSS1, HAS2, TFPI2	319	12	16792	13.1599	1	0.475673	30.3417
GOTERM_BP_DIRECT	GO:0051310~metaphase plate congression	3	0.906344	0.0208162	KIF2C, CENPF, NDC80	319	12	16792	13.1599	1	0.475673	30.3417
GOTERM_BP_DIRECT	GO:0042574~retinal metabolic process	3	0.906344	0.0208162	AKR1C3, CYP1B1, ALDH1A3	319	12	16792	13.1599	1	0.475673	30.3417
GOTERM_BP_DIRECT	GO:0045766~positive regulation of angiogenesis	7	2.1148	0.0221987	CYP1B1, ADM, CD34, CXCL8, IL1B, THBS1, DDAH1	319	115	16792	3.20414	1	0.492656	32.0131
GOTERM_BP_DIRECT	GO:0000722~telomere maintenance via recombination	4	1.20846	0.0222478	PRIM1, RFC4, PCNA, FEN1	319	32	16792	6.57994	1	0.488258	32.0717
GOTERM_BP_DIRECT	GO:0007093~mitotic cell cycle checkpoint	4	1.20846	0.0222478	MAD2L1, ZWINT, BUB1, TTK	319	32	16792	6.57994	1	0.488258	32.0717
GOTERM_BP_DIRECT	GO:0007049~cell cycle	10	3.02115	0.0227386	TXNIP, CKS1B, UHRF1, HJURP, FOXM1, AURKA, CDC20, MCM2, AURKB, CDKN3	319	217	16792	2.42578	1	0.490748	32.6554
GOTERM_BP_DIRECT	GO:0001822~kidney development	6	1.81269	0.0236602	ODC1, ASS1, FSTL3, CENPF, HAS2, DCN	319	86	16792	3.67252	1	0.499582	33.7387
GOTERM_BP_DIRECT	GO:0044267~cellular protein metabolic process	7	2.1148	0.0248206	PAPPA, GSN, TGFBI, LMCD1, HIST1H4C, MMP1, IGFBP5	319	118	16792	3.12268	1	0.51145	35.0794
GOTERM_BP_DIRECT	GO:0051216~cartilage development	5	1.51057	0.0254306	TYMS, CD44, LUM, CREB3L2, ZBTB16	319	59	16792	4.46097	1	0.515097	35.7739
GOTERM_BP_DIRECT	GO:0001525~angiogenesis	10	3.02115	0.026707	CCL2, CYP1B1, SRPX2, APOD, EPAS1, TGFBI, CXCL8, COL8A1, RAMP1, ADGRG1	319	223	16792	2.36052	1	0.527665	37.2044
GOTERM_BP_DIRECT	GO:0048661~positive regulation of smooth muscle cell proliferation	5	1.51057	0.0268538	ID2, PDGFRB, ITGA2, PDGFD, THBS1	319	60	16792	4.38662	1	0.524751	37.3671
GOTERM_BP_DIRECT	GO:0007517~muscle organ development	6	1.81269	0.026954	LAMA2, SGCG, TAGLN, CRYAB, FHL1, CENPF	319	89	16792	3.54873	1	0.521279	37.4778
GOTERM_BP_DIRECT	GO:0007565~female pregnancy	6	1.81269	0.026954	ADM, PAPPA, OXTR, ITGA2, FOSL1, IGFBP5	319	89	16792	3.54873	1	0.521279	37.4778
GOTERM_BP_DIRECT	GO:2000353~positive regulation of endothelial cell apoptotic process	3	0.906344	0.0279971	AKR1C3, RGCC, THBS1	319	14	16792	11.2799	1	0.530152	38.6198
GOTERM_BP_DIRECT	GO:0007160~cell-matrix adhesion	6	1.81269	0.0281135	CD44, CD34, COL13A1, FBLN5, ITGA2, ECM2	319	90	16792	3.5093	1	0.526949	38.7461
GOTERM_BP_DIRECT	GO:0006935~chemotaxis	7	2.1148	0.0286272	CXCL1, CCL2, CXCL8, CXCL6, FOSL1, PLAU, PLAUR	319	122	16792	3.0203	1	0.528826	39.3002
GOTERM_BP_DIRECT	GO:0016525~negative regulation of angiogenesis	5	1.51057	0.0298409	CCL2, RGCC, PTN, DCN, THBS1	319	62	16792	4.24512	1	0.539231	40.5907
GOTERM_BP_DIRECT	GO:0090307~mitotic spindle assembly	4	1.20846	0.0303113	KIF11, NEK2, TPX2, BIRC5	319	36	16792	5.84883	1	0.540354	41.0839
GOTERM_BP_DIRECT	GO:0051726~regulation of cell cycle	7	2.1148	0.030667	CCNB1, ADARB1, CCNB2, FOXM1, CCNF, KIAA0101, CENPF	319	124	16792	2.97158	1	0.540093	41.4543
GOTERM_BP_DIRECT	GO:0007076~mitotic chromosome condensation	3	0.906344	0.0319066	NCAPG, NUSAP1, CDCA5	319	15	16792	10.5279	1	0.550068	42.7279
GOTERM_BP_DIRECT	GO:0008284~positive regulation of cell proliferation	16	4.83384	0.0326271	ODC1, IRS2, PRC1, FOXM1, TTK, BIRC5, CDC20, AKR1C3, ADM, KIF20B, PTN, PDGFRB, HAS2, PDGFD, THBS1, FOSL1	319	466	16792	1.80736	1	0.553819	43.4561
GOTERM_BP_DIRECT	GO:0045944~positive regulation of transcription from RNA polymerase II promoter	28	8.45921	0.0328545	HMGB2, LMO2, LUM, E2F7, FOXM1, BEX1, FSTL3, FOXO1, ANKRD1, IL33, DCN, CITED2, HEY2, CREB3L2, H2AFZ, IL1B, TOP2A, FOSL1, FOXD1, CKAP2, BMP2, CEBPB, EXOSC9, EPAS1, HMGA1, UHRF1, RGCC, SLC40A1	319	981	16792	1.50245	1	0.551999	43.6841
GOTERM_BP_DIRECT	GO:0060326~cell chemotaxis	5	1.51057	0.034676	CXCL1, HMGB2, CCL2, PDGFRB, CXCL6	319	65	16792	4.04919	1	0.5675	45.4797
GOTERM_BP_DIRECT	GO:0010811~positive regulation of cell-substrate adhesion	4	1.20846	0.0348443	PTN, HACD1, ECM2, COL8A1	319	38	16792	5.541	1	0.564998	45.6428
GOTERM_BP_DIRECT	GO:0090090~negative regulation of canonical Wnt signaling pathway	8	2.41692	0.0357954	CTHRC1, DKK3, BMP2, DACT1, SOST, NKD2, FOXO1, SNAI2	319	163	16792	2.58353	1	0.570698	46.5562
GOTERM_BP_DIRECT	GO:0002244~hematopoietic progenitor cell differentiation	5	1.51057	0.0363828	FST, FSTL3, ANLN, TOP2A, CITED2	319	66	16792	3.98784	1	0.572521	47.1131
GOTERM_BP_DIRECT	GO:0007057~spindle assembly involved in female meiosis I	2	0.60423	0.0375177	FBXO5, AURKA	319	2	16792	52.6395	1	0.579751	48.1735
GOTERM_BP_DIRECT	GO:0000915~actomyosin contractile ring assembly	2	0.60423	0.0375177	KIF23, RACGAP1	319	2	16792	52.6395	1	0.579751	48.1735
GOTERM_BP_DIRECT	GO:0000022~mitotic spindle elongation	2	0.60423	0.0375177	KIF23, PRC1	319	2	16792	52.6395	1	0.579751	48.1735
GOTERM_BP_DIRECT	GO:0007346~regulation of mitotic cell cycle	4	1.20846	0.0397068	CKS1B, CKS2, FBXO5, BIRC5	319	40	16792	5.26395	1	0.596754	50.1627
GOTERM_BP_DIRECT	GO:0009948~anterior/posterior axis specification	3	0.906344	0.0403178	HEY2, AURKA, WLS	319	17	16792	9.28932	1	0.598371	50.705
GOTERM_BP_DIRECT	GO:0042325~regulation of phosphorylation	3	0.906344	0.0403178	MCM7, SRPX2, PPP1R14A	319	17	16792	9.28932	1	0.598371	50.705
GOTERM_BP_DIRECT	GO:0035690~cellular response to drug	5	1.51057	0.0417897	CCL2, IL1B, ANKRD1, GAS6, PPP1R14A	319	69	16792	3.81446	1	0.607748	51.9884
GOTERM_BP_DIRECT	GO:0043154~negative regulation of cysteine-type endopeptidase activity involved in apoptotic process	5	1.51057	0.0417897	CD44, CRYAB, BIRC5, THBS1, GAS6	319	69	16792	3.81446	1	0.607748	51.9884
GOTERM_BP_DIRECT	GO:0006915~apoptotic process	18	5.43807	0.0422518	CKAP2, CDK1, TPX2, FOXO1, BIRC5, MCM2, ZBTB16, GAS6, PRUNE2, CDCA7, BUB1, SH3KBP1, IL1B, SEMA3A, PPP1R15A, CD14, MELK, PHLDA1	319	567	16792	1.6711	1	0.607861	52.3849
GOTERM_BP_DIRECT	GO:0071347~cellular response to interleukin-1	5	1.51057	0.0456331	CCL2, CEBPB, CXCL8, HAS2, ANKRD1	319	71	16792	3.70701	1	0.632834	55.1932
GOTERM_BP_DIRECT	GO:0045926~negative regulation of growth	3	0.906344	0.0494602	MT1M, MT1X, IGFBP5	319	19	16792	8.3115	1	0.659235	58.1834
GOTERM_BP_DIRECT	GO:0051276~chromosome organization	3	0.906344	0.0494602	CDCA8, PTTG3P, PTTG1	319	19	16792	8.3115	1	0.659235	58.1834
GOTERM_BP_DIRECT	GO:0032508~DNA duplex unwinding	4	1.20846	0.0503998	GINS2, CDC45, MCM3, MCM5	319	44	16792	4.78541	1	0.662436	58.8881
GOTERM_BP_DIRECT	GO:0034644~cellular response to UV	4	1.20846	0.0503998	PCNA, PTN, PBK, AURKB	319	44	16792	4.78541	1	0.662436	58.8881
GOTERM_BP_DIRECT	GO:0007050~cell cycle arrest	7	2.1148	0.0518641	KIF20B, CXCL8, GAS1, THBS1, CDKN3, PPP1R15A, GAS6	319	141	16792	2.61331	1	0.66937	59.9643
GOTERM_BP_DIRECT	GO:0043066~negative regulation of apoptotic process	15	4.53172	0.0518849	STIL, CDK1, LIMS2, CRYAB, FOXO1, AURKA, BIRC5, GAS6, PLAUR, CITED2, MAD2L1, CD44, PDGFRB, THBS1, SLC40A1	319	455	16792	1.73537	1	0.665727	59.9794
GOTERM_BP_DIRECT	GO:0045892~negative regulation of transcription, DNA-templated	16	4.83384	0.0532542	BMP2, HMGB2, CEBPB, FOXM1, FOXO1, CENPF, BIRC5, DEPDC1, ZBTB16, HMGA1, GAS6, CITED2, DKK3, ID2, HEY2, FOXD1	319	499	16792	1.68784	1	0.671769	60.9613
GOTERM_BP_DIRECT	GO:0034976~response to endoplasmic reticulum stress	5	1.51057	0.0538913	CEBPB, CREB3L2, CXCL8, THBS1, PPP1R15A	319	75	16792	3.5093	1	0.672527	61.4104
GOTERM_BP_DIRECT	GO:0014911~positive regulation of smooth muscle cell migration	3	0.906344	0.0542848	PDGFRB, ITGA2, HAS2	319	20	16792	7.89592	1	0.671588	61.6853
GOTERM_BP_DIRECT	GO:2000377~regulation of reactive oxygen species metabolic process	3	0.906344	0.0542848	CYP1B1, FOXM1, FOXO1	319	20	16792	7.89592	1	0.671588	61.6853
GOTERM_BP_DIRECT	GO:0001892~embryonic placenta development	3	0.906344	0.0542848	CEBPB, EPAS1, CITED2	319	20	16792	7.89592	1	0.671588	61.6853
GOTERM_BP_DIRECT	GO:0000052~citrulline metabolic process	2	0.60423	0.0557469	ASS1, DDAH1	319	3	16792	35.093	1	0.677942	62.6909
GOTERM_BP_DIRECT	GO:1900625~positive regulation of monocyte aggregation	2	0.60423	0.0557469	CD44, HAS2	319	3	16792	35.093	1	0.677942	62.6909
GOTERM_BP_DIRECT	GO:0070487~monocyte aggregation	2	0.60423	0.0557469	CD44, IL1B	319	3	16792	35.093	1	0.677942	62.6909
GOTERM_BP_DIRECT	GO:0030324~lung development	5	1.51057	0.0560742	EPAS1, CRISPLD2, HSD11B1, FSTL3, PTN	319	76	16792	3.46312	1	0.676545	62.9125
GOTERM_BP_DIRECT	GO:0071356~cellular response to tumor necrosis factor	6	1.81269	0.0580616	CCL2, ASS1, CXCL8, HAS2, ANKRD1, THBS1	319	110	16792	2.87125	1	0.686062	64.2321
GOTERM_BP_DIRECT	GO:0009615~response to virus	6	1.81269	0.0580616	ODC1, ACTA2, IFITM3, STMN1, HMGA1, FOSL1	319	110	16792	2.87125	1	0.686062	64.2321
GOTERM_BP_DIRECT	GO:0071230~cellular response to amino acid stimulus	4	1.20846	0.0592407	COL4A1, CEBPB, ASS1, PDGFD	319	47	16792	4.47996	1	0.690082	64.9939
GOTERM_BP_DIRECT	GO:0042730~fibrinolysis	3	0.906344	0.0592676	PROS1, PLAU, PLAUR	319	21	16792	7.51993	1	0.686775	65.0111
GOTERM_BP_DIRECT	GO:1901687~glutathione derivative biosynthetic process	3	0.906344	0.0644009	GSTM2, GSTT1, MGST1	319	22	16792	7.17811	1	0.714315	68.1517
GOTERM_BP_DIRECT	GO:0060045~positive regulation of cardiac muscle cell proliferation	3	0.906344	0.0644009	CCNB1, CDK1, HEY2	319	22	16792	7.17811	1	0.714315	68.1517
GOTERM_BP_DIRECT	GO:0001503~ossification	5	1.51057	0.0652739	SOST, FSTL3, MGP, SORT1, TMEM119	319	80	16792	3.28997	1	0.715937	68.6587
GOTERM_BP_DIRECT	GO:0042542~response to hydrogen peroxide	4	1.20846	0.0720726	TXNIP, CRYAB, PDGFRB, FOSL1	319	51	16792	4.12859	1	0.748862	72.3545
GOTERM_BP_DIRECT	GO:0043137~DNA replication, removal of RNA primer	2	0.60423	0.073632	RNASEH2A, FEN1	319	4	16792	26.3197	1	0.753369	73.1423
GOTERM_BP_DIRECT	GO:2000065~negative regulation of cortisol biosynthetic process	2	0.60423	0.073632	DKK3, BMP2	319	4	16792	26.3197	1	0.753369	73.1423
GOTERM_BP_DIRECT	GO:0070164~negative regulation of adiponectin secretion	2	0.60423	0.073632	IL1B, RAB11FIP1	319	4	16792	26.3197	1	0.753369	73.1423
GOTERM_BP_DIRECT	GO:0044772~mitotic cell cycle phase transition	2	0.60423	0.073632	CKS1B, CKS2	319	4	16792	26.3197	1	0.753369	73.1423
GOTERM_BP_DIRECT	GO:0061333~renal tubule morphogenesis	2	0.60423	0.073632	MTSS1, COL4A1	319	4	16792	26.3197	1	0.753369	73.1423
GOTERM_BP_DIRECT	GO:0046602~regulation of mitotic centrosome separation	2	0.60423	0.073632	KIF11, NEK2	319	4	16792	26.3197	1	0.753369	73.1423
GOTERM_BP_DIRECT	GO:0042482~positive regulation of odontogenesis	2	0.60423	0.073632	BMP2, CD34	319	4	16792	26.3197	1	0.753369	73.1423
GOTERM_BP_DIRECT	GO:0061304~retinal blood vessel morphogenesis	2	0.60423	0.073632	COL4A1, CYP1B1	319	4	16792	26.3197	1	0.753369	73.1423
GOTERM_BP_DIRECT	GO:0031577~spindle checkpoint	2	0.60423	0.073632	BIRC5, AURKB	319	4	16792	26.3197	1	0.753369	73.1423
GOTERM_BP_DIRECT	GO:0010748~negative regulation of plasma membrane long-chain fatty acid transport	2	0.60423	0.073632	IRS2, THBS1	319	4	16792	26.3197	1	0.753369	73.1423
GOTERM_BP_DIRECT	GO:0032348~negative regulation of aldosterone biosynthetic process	2	0.60423	0.073632	DKK3, BMP2	319	4	16792	26.3197	1	0.753369	73.1423
GOTERM_BP_DIRECT	GO:0007088~regulation of mitotic nuclear division	3	0.906344	0.0750897	NEK2, KIF20B, FBXO5	319	24	16792	6.57994	1	0.757244	73.8595
GOTERM_BP_DIRECT	GO:0046686~response to cadmium ion	3	0.906344	0.0806309	CDK1, NUDT1, PCNA	319	25	16792	6.31674	1	0.779299	76.4247
GOTERM_BP_DIRECT	GO:0006259~DNA metabolic process	3	0.906344	0.0862942	NT5E, KPNA2, TK1	319	26	16792	6.07379	1	0.799616	78.8001
GOTERM_BP_DIRECT	GO:0045930~negative regulation of mitotic cell cycle	3	0.906344	0.0862942	MAD2L1, BTG3, GAS1	319	26	16792	6.07379	1	0.799616	78.8001
GOTERM_BP_DIRECT	GO:0071897~DNA biosynthetic process	3	0.906344	0.0862942	TYMS, CENPF, TK1	319	26	16792	6.07379	1	0.799616	78.8001
GOTERM_BP_DIRECT	GO:0050999~regulation of nitric-oxide synthase activity	3	0.906344	0.0862942	IL1B, DDAH1, GCHFR	319	26	16792	6.07379	1	0.799616	78.8001
GOTERM_BP_DIRECT	GO:0001570~vasculogenesis	4	1.20846	0.0896866	ADM, HEY2, HAS2, CITED2	319	56	16792	3.75996	1	0.809664	80.1131
GOTERM_BP_DIRECT	GO:0006749~glutathione metabolic process	4	1.20846	0.0896866	GSTM2, CLIC3, GSTT1, MGST1	319	56	16792	3.75996	1	0.809664	80.1131
GOTERM_BP_DIRECT	GO:0042262~DNA protection	2	0.60423	0.0911793	NUDT1, CBS	319	5	16792	21.0558	1	0.812341	80.6663
GOTERM_BP_DIRECT	GO:0009157~deoxyribonucleoside monophosphate biosynthetic process	2	0.60423	0.0911793	TYMS, TK1	319	5	16792	21.0558	1	0.812341	80.6663
GOTERM_BP_DIRECT	GO:0042133~neurotransmitter metabolic process	2	0.60423	0.0911793	MAOA, GCHFR	319	5	16792	21.0558	1	0.812341	80.6663
GOTERM_BP_DIRECT	GO:2000647~negative regulation of stem cell proliferation	2	0.60423	0.0911793	FBLN1, SNAI2	319	5	16792	21.0558	1	0.812341	80.6663
GOTERM_BP_DIRECT	GO:0061156~pulmonary artery morphogenesis	2	0.60423	0.0911793	HEY2, CITED2	319	5	16792	21.0558	1	0.812341	80.6663
GOTERM_BP_DIRECT	GO:0000727~double-strand break repair via break-induced replication	2	0.60423	0.0911793	GINS2, CDC45	319	5	16792	21.0558	1	0.812341	80.6663
GOTERM_BP_DIRECT	GO:0060385~axonogenesis involved in innervation	2	0.60423	0.0911793	NPTX1, SEMA3A	319	5	16792	21.0558	1	0.812341	80.6663
GOTERM_BP_DIRECT	GO:0007100~mitotic centrosome separation	2	0.60423	0.0911793	KIF11, AURKA	319	5	16792	21.0558	1	0.812341	80.6663
GOTERM_BP_DIRECT	GO:0032496~response to lipopolysaccharide	7	2.1148	0.0919895	CXCL1, HMGB2, ADM, BDKRB1, CXCL6, DCN, MGST1	319	164	16792	2.24681	1	0.812515	80.9604
GOTERM_BP_DIRECT	GO:0060349~bone morphogenesis	3	0.906344	0.0920731	CHSY1, HAS2, CITED2	319	27	16792	5.84883	1	0.81009	80.9905
GOTERM_BP_DIRECT	GO:0009887~organ morphogenesis	5	1.51057	0.0972063	BMP2, CCL2, FHL1, ITGA2, DCN	319	92	16792	2.86084	1	0.825125	82.7556
GOTERM_BP_DIRECT	GO:0045931~positive regulation of mitotic cell cycle	3	0.906344	0.097961	CCNB1, CDK1, BIRC5	319	28	16792	5.63995	1	0.825014	83.0018
GOTERM_BP_DIRECT	GO:0043388~positive regulation of DNA binding	3	0.906344	0.097961	HMGB2, ITGA2, PLAUR	319	28	16792	5.63995	1	0.825014	83.0018
